# Supplementary material for: Humoral Responses and Serological Assays in SARS-CoV-2 Infections
Source: PubMed Central journal article supplement (PMC7775512; doi:10.3389/fimmu.2020.610688), 2020-12-18
Supplement: Table_1.pdf [file Table_1.pdf]

# **Humoral Responses and Serological Assays in SARS-CoV-2 Infections**

**Yannick Galipeau<sup>1,\*</sup>, Matthew Greig<sup>1,\*</sup>, George Liu<sup>1</sup>, Matt Driedger<sup>2</sup> and  
Marc-André Langlois<sup>1,3</sup>**

**SUPPLEMENTARY MATERIAL**

**Table S1: Approved Tests For SARS-CoV-2 Serology**

| Company             | Test Name                                        | Approvals                      | Test Type | Antigen       | Ig          | Specificity            | Sensitivity          | PPV/PPA             | NPV/NPA               | URL                                                                                                                                                                                                         |
|---------------------|--------------------------------------------------|--------------------------------|-----------|---------------|-------------|------------------------|----------------------|---------------------|-----------------------|-------------------------------------------------------------------------------------------------------------------------------------------------------------------------------------------------------------|
| Abbott              | Alinity i SARS-CoV-2 IgG                         | USA, Canada, UK, EU, Australia | CLIA      | N             | IgG         | 99%                    | 100%                 | 84%                 | 100%                  | <a href="https://www.corelaboratory.abbott/us/en/offerings/segments/infectious-disease/sars-cov-2">https://www.corelaboratory.abbott/us/en/offerings/segments/infectious-disease/sars-cov-2</a>             |
| Abbott              | Architect SARS-CoV-2 IgG                         | USA, Canada, UK, EU, Australia | CLIA      | N             | IgG         | 99.6%                  | 100%                 | 92.9%               | 100%                  | <a href="https://www.corelaboratory.abbott/us/en/offerings/segments/infectious-disease/sars-cov-2">https://www.corelaboratory.abbott/us/en/offerings/segments/infectious-disease/sars-cov-2</a>             |
| Abingdon Health     | AbC-19 Rapid Test                                | UK, EU                         | LFA       | Sp            | IgG         | 99.56%                 | 98.03%               |                     |                       | <a href="https://www.abingdonhealth.com/uk-covid-19-rapid-antibody-tests-approved-for-professional-use/">https://www.abingdonhealth.com/uk-covid-19-rapid-antibody-tests-approved-for-professional-use/</a> |
| ADS Biotec          | SARS-CoV-2 IgM/IgG Antibody Test Kit             | USA, EU                        | LFA       | Viral Antigen | IgG and IgM | 99.5%                  | 97.5%                |                     |                       | <a href="http://www.adsbiotec.com/products/sars-cov-2-test-kits/">http://www.adsbiotec.com/products/sars-cov-2-test-kits/</a>                                                                               |
| Assure Tech         | Assure COVID-19 IgG/IgM                          | USA                            | LFA       | N +S1         | IgG and IgM | IgG 100%<br>IgM 98.8%  | IgG 90%<br>IgM 100%  | 80.8%               | 100%                  | <a href="https://www.fda.gov/media/139792/download">https://www.fda.gov/media/139792/download</a>                                                                                                           |
| Autobio Diagnostics | Anti-SARS-CoV-2 Rapid Test                       | EU                             | LFA       | Sp            | IgG and IgM | IgG 99.4%<br>IgM 99.7% | IgG 99%<br>IgM 95.7% | 84.4%               | 99.9%                 | <a href="http://www.autobio.com.cn/en/">http://www.autobio.com.cn/en/</a>                                                                                                                                   |
| Babson Diagnostics  | Babson Diagnostics aC19G1                        | USA                            | CLIA      | ?             | IgG         | 100%                   | 100%                 | 100%                | 100%                  | <a href="https://www.fda.gov/media/139446/download">https://www.fda.gov/media/139446/download</a>                                                                                                           |
| Beckman Coulter     | Access SARS-CoV-2 IgG                            | USA                            | CLIA      | RBD           | IgG         | 99.6%                  | 96.8%                | 92.7%               | 99.2%                 | <a href="https://www.fda.gov/media/139627/download">https://www.fda.gov/media/139627/download</a>                                                                                                           |
| Beijing Wantai      | Wantai SARS-CoV-2 Ab Rapid Test                  | USA                            | LFA       | Viral Antigen | Pan-Ig      | 98.8%                  | 100%                 | 80.8%               | 100%                  | <a href="https://www.fda.gov/media/140030/download">https://www.fda.gov/media/140030/download</a>                                                                                                           |
| Beijing Wantai      | Wantai SARS-CoV-2 Ab ELISA                       | USA                            | ELISA     | RBD           | Pan-Ig      | 97.5%                  | 96.7%                | 67.1%               | 99.8%                 | <a href="https://www.fda.gov/media/140929/download">https://www.fda.gov/media/140929/download</a>                                                                                                           |
| Beroni Group        | SARS-CoV-2 IgG/IgM Antibody Detection Kit        | EU                             | LFA       | ?             | IgG and IgM | 88.57%                 | 100%                 |                     |                       | <a href="https://www.beronigroup.com/covid-19/">https://www.beronigroup.com/covid-19/</a>                                                                                                                   |
| BioCheck Inc        | BioCheck SARS-CoV-2 IgG IgM Combo Test           | USA, EU                        | CLIA      | S1            | IgG and IgM | IgG 100%<br>IgM 97.2%  | IgG 100%<br>IgM 89%  | IgG 100%<br>IgM 89% | IgG 97.2%<br>IgM 100% | <a href="https://www.fda.gov/media/141251/download">https://www.fda.gov/media/141251/download</a>                                                                                                           |
| Biohit Healthcare   | Biohit SARS-CoV-2 IgM/IgG Test Kit               | USA                            | LFA       | N             | IgG and IgM | 95%                    | 96.7%                | 50.4%               | 99.8%                 | <a href="https://www.fda.gov/media/139283/download">https://www.fda.gov/media/139283/download</a>                                                                                                           |
| Biolidics           | 2019-nCoV IgG/IgM Detection Kit (Colloidal Gold) | EU                             | LFA       | Viral Antigen | IgG and IgM | 97%                    | 91.5%                |                     |                       | <a href="https://www.biolidics.com/2019-ncov-igg-igm-antibody-detection-kit">https://www.biolidics.com/2019-ncov-igg-igm-antibody-detection-kit</a>                                                         |

|                      |                                                        |                    |             |               |                       |                        |                        |             |             |                                                                                                                                                                                                                     |
|----------------------|--------------------------------------------------------|--------------------|-------------|---------------|-----------------------|------------------------|------------------------|-------------|-------------|---------------------------------------------------------------------------------------------------------------------------------------------------------------------------------------------------------------------|
| BioMedomics          | COVID-19 IgM-IgG Rapid Test                            | EU                 | LFA         | Viral Antigen | IgG and IgM           | 97%                    | 96.7%                  |             |             | <a href="https://www.biomedomics.com/products/infectious-disease/covid-19-rt/">https://www.biomedomics.com/products/infectious-disease/covid-19-rt/</a>                                                             |
| Biomerica            | COVID-19 IgG/IgM Rapid Test                            | EU                 | LFA         | ?             | IgG and IgM           | 100%                   | 87%                    |             |             | <a href="http://www.biomerica.com/products/product_detail.asp?ProductID=154">http://www.biomerica.com/products/product_detail.asp?ProductID=154</a>                                                                 |
| BioMerieux           | Vidas anti-SARS-CoV-2 IgG Test                         | USA, EU            | ELFA        | ?             | IgG                   | 99.9%                  | 100%                   | 98.1%       | 100%        | <a href="https://www.biomerieux-diagnostics.com/vidas-sars-cov-2">https://www.biomerieux-diagnostics.com/vidas-sars-cov-2</a>                                                                                       |
| Biomerieux           | Vidas anti-SARS-CoV-2 IgM Test                         | USA, EU            | ELFA        | ?             | IgM                   | 99.4%                  | 100%                   | 89%         | 100%        | <a href="https://www.biomerieux-diagnostics.com/vidas-sars-cov-2">https://www.biomerieux-diagnostics.com/vidas-sars-cov-2</a>                                                                                       |
| BioPanda Reagents    | COVID-19 Rapid Antibody Test                           | EU                 | LFA         | Viral Antigen | IgG and IgM           | IgG 98.3%<br>IgM 96.7% | 100%                   |             |             | <a href="https://www.biopanda.co.uk/php/products/rapid/infectious_diseases/covid19.php">https://www.biopanda.co.uk/php/products/rapid/infectious_diseases/covid19.php</a>                                           |
| Bio-Rad Labs         | Platelia SARS-CoV-2 Total Ab                           | USA, Australia     | ELISA       | N             | Pan-Ig                | 99.6%                  | 92.2%                  | 88.6%       | 99.9%       | <a href="https://www.bio-rad.com/featured/en/sars-cov-2-surveillance.html">https://www.bio-rad.com/featured/en/sars-cov-2-surveillance.html</a>                                                                     |
| Cellex               | qSARS-CoV-2 IgG/IgM Rapid Test                         | USA, Australia,    | LFA         | Sp + N        | IgG and IgM           | 95.6%                  | 93.8%                  | 91.7%       | 99.6%       | <a href="https://cellexcovid.com/product/">https://cellexcovid.com/product/</a>                                                                                                                                     |
| CTK Biotech          | OnSite COVID-19 IgG/IgM Rapid Test                     | EU, Australia      | LFA         | Viral Antigen | IgG and IgM           | IgG 100%<br>IgM 100%   | IgG 98.8%<br>IgM 88.2% | Combo 46.8% | Combo 99.6% | <a href="https://ctkbiotech.com/product/onsite-covid-19-igg-igm-rapid-test/">https://ctkbiotech.com/product/onsite-covid-19-igg-igm-rapid-test/</a>                                                                 |
| DiaSorin Inc         | Liaison SARS-CoV-2 S1/S2 IgG                           | USA, Canada, EU    | CLIA        | Sp            | IgG                   | 99.3%                  | 97.6%                  | 87.5%       | 99.9%       | <a href="https://www.diasorin.com/en/immunodiagnostic-solutions/clinical-areas/infectious-diseases/covid-19">https://www.diasorin.com/en/immunodiagnostic-solutions/clinical-areas/infectious-diseases/covid-19</a> |
| Diazyme Laboratories | Diazyme DZ-Lite SARS-CoV-2 IgG                         | USA                | CLIA        | Viral Antigen | IgG                   | 97.4%                  | 100%                   | 67.1%       | 100%        | <a href="https://www.fda.gov/media/139865/download">https://www.fda.gov/media/139865/download</a>                                                                                                                   |
| Emory Medical        | SARS-CoV-2 RBD IgG Test                                | USA                | ELISA       | RBD           | IgG                   | 96.4%                  | 100%                   | 59.3%       | 100%        | <a href="https://www.fda.gov/media/139053/download">https://www.fda.gov/media/139053/download</a>                                                                                                                   |
| Erba Mannheim        | ErbaLisa COVID-19 ELISA Kits                           | EU                 | ELISA       | N             | IgG and IgM           | 98%                    | 98%                    | 88%         | 99.9%       | <a href="https://erbalisacovid19.erbamannheim.com/">https://erbalisacovid19.erbamannheim.com/</a>                                                                                                                   |
| Eurofins Ingasana    | Ingezim COVID 19 DR                                    | EU                 | ELISA + LFA | N             | Pan Ig                | 99.2%                  | 98.3%                  |             |             | <a href="https://www.eurofins-technologies.com/ingezim-covid-19-dr.html">https://www.eurofins-technologies.com/ingezim-covid-19-dr.html</a>                                                                         |
| EUROIMMUN            | SARS-CoV-2 ELISA (IgG)                                 | USA, EU, Australia | ELISA       | S1            | IgG                   | 100%                   | 90%                    | 100%        | 99.5%       | <a href="https://www.euroimmun.com/products/infection-diagnostics/pd/emerging-diseases/2606/2/69492/">https://www.euroimmun.com/products/infection-diagnostics/pd/emerging-diseases/2606/2/69492/</a>               |
| GenScript Biotech    | cPass SARS-CoV-2 Neutralization Antibody Detection Kit | EU                 | ELISA       | S1 RBD        | Total Neutralizing Ig | 94%                    | 96.7%                  | 100%        | 99.5%       | <a href="https://www.genscript.com/covid-19-detection-svnt.html">https://www.genscript.com/covid-19-detection-svnt.html</a>                                                                                         |

|                                                |                                                 |                    |       |                |                 |                        |                       |                        |                        |                                                                                                                                                                                                                                                                 |
|------------------------------------------------|-------------------------------------------------|--------------------|-------|----------------|-----------------|------------------------|-----------------------|------------------------|------------------------|-----------------------------------------------------------------------------------------------------------------------------------------------------------------------------------------------------------------------------------------------------------------|
| Gold Standard Diagnostics/ Eurofins Technology | NovaLisa SARS-CoV-2 IgG, IgA, IgM Assays        | EU                 | ELISA | Viral Antigens | IgG, IgM or IgA | IgG >98%               | IgG 100%              |                        |                        | <a href="https://www.eurofinsgenomics.eu/en/genes-synthesis-molecular-biology/applications/sars-cov-2-elisa-kits/">https://www.eurofinsgenomics.eu/en/genes-synthesis-molecular-biology/applications/sars-cov-2-elisa-kits/</a>                                 |
| Hangzhou AllTest Biotech                       | Rightsign 2019-nCoV IgG/IgM Rapid Test Cassette | USA, EU, Australia | LFA   | Sp             | IgG and IgM     | IgG 98%<br>IgM 96%     | IgG 100%<br>IgM 85%   | 100%                   | 100%                   | <a href="http://en.biotests.com.cn/">http://en.biotests.com.cn/</a>                                                                                                                                                                                             |
| Healgen Scientific LLC                         | COVID-19 Antibody Rapid Detection Kit           | USA, Australia     | LFA   | Sp             | IgG and IgM     | 97.5%                  | 100%                  | 100%                   | 100%                   | <a href="https://www.healgen.com/if-respiratory-covid-19">https://www.healgen.com/if-respiratory-covid-19</a>                                                                                                                                                   |
| InBios International                           | SCoV-2 Detect IgG/IgM Tests                     | USA                | ELISA | Viral Antigen  | IgG or IgM      | IgG 100%<br>IgM 98.8%  | IgG 100%<br>IgM 96.7% | IgG 97.8%<br>IgM 92.5% | IgG 98.9%<br>IgM 98.9% | <a href="https://www.fda.gov/media/138810/download">https://www.fda.gov/media/138810/download</a><br><a href="https://www.fda.gov/media/139730/download">https://www.fda.gov/media/139730/download</a>                                                          |
| Kabla Clinical Diagnostics                     | Rapid Test for Coronavirus IgG IgM Antibodies   | EU,                | LFA   | Viral Antigen  | IgG and IgM     | IgG 98%<br>IgM 96%     | IgG 99.9%<br>IgM 85%  |                        |                        | <a href="https://kabla.mx/covid-test/">https://kabla.mx/covid-test/</a>                                                                                                                                                                                         |
| Luminex                                        | xMAP SARS-CoV-2 Multi-Antigen IgG               | USA                | MIA   | N, RBD and S1  | IgG             | 99.2%                  | 100%                  | 88.4%                  | 99.8%                  | <a href="https://www.fda.gov/media/140256/download">https://www.fda.gov/media/140256/download</a>                                                                                                                                                               |
| Mediagnost                                     | Anti-SARS CoV-2 ELISA                           | EU                 | ELISA | S1 RBD         | IgG             | 98.6%                  | 95.3%                 | 67.8%                  | 100%                   | <a href="https://mediagnost.de/en/anti-sars-cov-2-elisa/">https://mediagnost.de/en/anti-sars-cov-2-elisa/</a>                                                                                                                                                   |
| MedMira                                        | REVEALCOVID-19 Total Antibody Test              | EU                 | VFA   | Viral Antigen  | Pan Ig          | 98.8%                  |                       |                        |                        | <a href="https://revealcovid19.com/">https://revealcovid19.com/</a>                                                                                                                                                                                             |
| Megna Health Inc.                              | Rapid COVID-19 IgM/IgG Combo Test Kit           | USA                | LFA   | N              | IgG and IgM     | IgG 97.5%<br>IgM 97.5% | IgG 100%<br>IgM 83.3% | 51.3%                  | 100%                   | <a href="https://www.fda.gov/media/140297/download">https://www.fda.gov/media/140297/download</a>                                                                                                                                                               |
| Mount Sinai Hospital Clinical Laboratory       | Mt. Sinai Lab COVID-19 ELISA Antibody Test      | USA                | ELISA | Sp             | Pan Ig          | 100%                   | 92.5%                 | 97%                    | 98%                    | <a href="https://www.mountsinai.org/about/covid19/antibody-test">https://www.mountsinai.org/about/covid19/antibody-test</a>                                                                                                                                     |
| Nad von minden                                 | Nadal COVID-19 IgG/IgM test                     | EU                 | LFA   | Viral Antigen  | IgG and IgM     | 99.2%                  | 94.1%                 | 100%                   | 99.6%                  | <a href="http://www.nal-vonminden.com/pdf/EN-COVID19-Infolyer.pdf">http://www.nal-vonminden.com/pdf/EN-COVID19-Infolyer.pdf</a>                                                                                                                                 |
| Ortho-Clinical Diagnostics Inc                 | VITROS Anti-SARS-CoV-2 IgG Test                 | USA, EU            | CLIA  | Sp             | IgG             | 100%                   | 90%                   | 100%                   | 99.5%                  | <a href="https://www.orthoclinicaldiagnostics.com/global/covid19/antibody-test">https://www.orthoclinicaldiagnostics.com/global/covid19/antibody-test</a>                                                                                                       |
| Ortho-Clinical Diagnostics Inc                 | VITROS Anti-SARS-CoV-2 Total Test               | USA, Canada, EU    | CLIA  | Sp             | Pan-Ig          | 100%                   | 100%                  | 100%                   | 99.5%                  | <a href="https://www.orthoclinicaldiagnostics.com/global/covid19/antibody-test">https://www.orthoclinicaldiagnostics.com/global/covid19/antibody-test</a>                                                                                                       |
| PerkinElmer                                    | SuperFlex™ Anti-SARS-CoV-2 IgG Kit              | EU                 | CLIA  | Viral Antigen  | IgG             | 100%                   | 100%                  | 90.3%                  |                        | <a href="https://perkinelmer-appliedgenomics.com/home/products/superflex-immunoassay-system-ce-ivd/superflex-sars-cov-2-antibody-">https://perkinelmer-appliedgenomics.com/home/products/superflex-immunoassay-system-ce-ivd/superflex-sars-cov-2-antibody-</a> |

|                                           |                                                            |                  |          |                    |             |                       |                      |       |       | <a href="#">detection-kits-ce-ivd/</a>                                                                                                                                                                                                                                                    |
|-------------------------------------------|------------------------------------------------------------|------------------|----------|--------------------|-------------|-----------------------|----------------------|-------|-------|-------------------------------------------------------------------------------------------------------------------------------------------------------------------------------------------------------------------------------------------------------------------------------------------|
| PerkinElmer                               | PerkinElmer GSP/DELFLIA Anti-SARS-CoV-2 IgG Kit            | EU               | DBS ELFA | Viral Antigen      | IgG         | 98.7%                 | 96.2%                |       |       | <a href="https://perkinelmer-appliedgenomics.com/home/sars-cov-2-testing-solutions/perkinelmer-gsp-delfia-anti-sars-cov-2-igg-kit/">https://perkinelmer-appliedgenomics.com/home/sars-cov-2-testing-solutions/perkinelmer-gsp-delfia-anti-sars-cov-2-igg-kit/</a>                         |
| Quotient                                  | Mosaiq COVID-19 Antibody Microarray                        | EU               | MIRA     | ?                  | IgG and IgM | 99.8%                 | 100%                 | 100%  | 100%  | <a href="https://quotientbd.com/covid-19">https://quotientbd.com/covid-19</a>                                                                                                                                                                                                             |
| Roche                                     | Elecsys Anti-SARS-CoV-2                                    | USA, Canada, UK, | ECLIA    | N                  | Pan-Ig      | 99.8%                 | 100%                 | 96.5% | 100%  | <a href="https://diagnostics.roche.com/global/en/products/params/electsys-anti-sars-cov-2.html">https://diagnostics.roche.com/global/en/products/params/electsys-anti-sars-cov-2.html</a>                                                                                                 |
| Salofa Oy                                 | Sienna-Clarity COVIBLOCK COVID-19 IgG IgM Rapid Test       | USA              | LFA      | RBD                | IgG and IgM | IgG 98.8%<br>IgM 100% | IgG 93.3%<br>IgM 90% | 79.7% | 99.6% | <a href="https://www.fda.gov/media/140082/download">https://www.fda.gov/media/140082/download</a>                                                                                                                                                                                         |
| Siemens Healthcare Diagnostic Inc         | Attelica IM / ADVIA Centaur SARS-CoV-2 Total Assay         | USA, Canada, EU  | CLIA     | S1 RBD             | IgG and IgM | 99.8%                 | 100%                 | 96.5% | 100%  | <a href="https://www.siemens-healthineers.com/en-ca/laboratory-diagnostics/assays-by-diseases-conditions/infectious-disease-assays/cov2t-assay">https://www.siemens-healthineers.com/en-ca/laboratory-diagnostics/assays-by-diseases-conditions/infectious-disease-assays/cov2t-assay</a> |
| Snibe Diagnostics                         | Maglumi 2019 nCoV (SARS-CoV-2) IgM/IgG Kits                | EU               | CLIA     | ?                  | IgG and IgM | 96%                   | 89-95%               | 96.6% | 100%  | <a href="http://www.snibe.com/zh_en/en_newsView.aspx?id=576">http://www.snibe.com/zh_en/en_newsView.aspx?id=576</a>                                                                                                                                                                       |
| SureScreen Diagnostics                    | SureScreen COVID19 IgM/IgG Rapid Test Cassette             | EU               | LFA      | Viral Antigen      | IgG and IgM | 99%                   | 91%                  |       |       | <a href="https://www.surescreen.com/products/covid-19-coronavirus-rapid-test-cassette">https://www.surescreen.com/products/covid-19-coronavirus-rapid-test-cassette</a>                                                                                                                   |
| Vibrant America                           | Vibrant COVID-19 Antibody Test                             | USA              | CLIA     | S1, RBD, S2, and N | IgG and IgM | 98.6%                 | 98.1%                | 78.7% | 99.9% | <a href="https://www.vibrant-america.com/covid-19-antibody/">https://www.vibrant-america.com/covid-19-antibody/</a>                                                                                                                                                                       |
| Wadsworth Center, NY State Dep. of Health | NY Sars-CoV Microsphere Immunoassay for Antibody Detection | USA              | MIA      | N                  | Pan-Ig      | 98.8%                 | 88%                  | 79.4% | 99.4% | <a href="http://dmna.ny.gov/covid19/docs/all/DOH_COVID19_AntibodyTestingFactSheet_041420.pdf">http://dmna.ny.gov/covid19/docs/all/DOH_COVID19_AntibodyTestingFactSheet_041420.pdf</a>                                                                                                     |
| Xiamen Biotime Biotech                    | Biotime SARS-CoV-2 IgG/IgM Rapid Qualitative Test          | USA              | LFA      | Viral Antigen      | IgG and IgM | 96.2%                 | 100%                 | 58.4% | 100%  | <a href="https://www.fda.gov/media/140443/download">https://www.fda.gov/media/140443/download</a>                                                                                                                                                                                         |

**Abbreviations:**

DBS: Dried Blood Spot  
 ECLIA: Electrochemiluminescence Immunoassay  
 ELFA: Enzyme Linked Fluorescent Assay  
 ELISA: Enzyme Linked Immunosorbent Assay

ELFA: Enzyme Linked Fluorescent Assay  
 LFA: Lateral Flow Assay  
 MIA: Microsphere Immunoassay  
 MIRA: Multiplexed Immuno-Refractory Assay  
 NPV/NPA: Negative Predictive Value  
 PPV/PPA: Positive Predictive Value  
 VFA: Vertical Flow Assay

USA = FDA EUA Granted  
 EU = CE-IVD Granted  
 Can = Health Canada Approved  
 UK = England Public Health Approved  
 Australia = Australia Public Health Approved
